# Supplementary material for: Golgi-associated LC3 lipidation requires V-ATPase in noncanonical autophagy
Source: PubMed Central journal article supplement (PMC5108321; doi:10.1038/cddis.2016.236), 2016-08-11

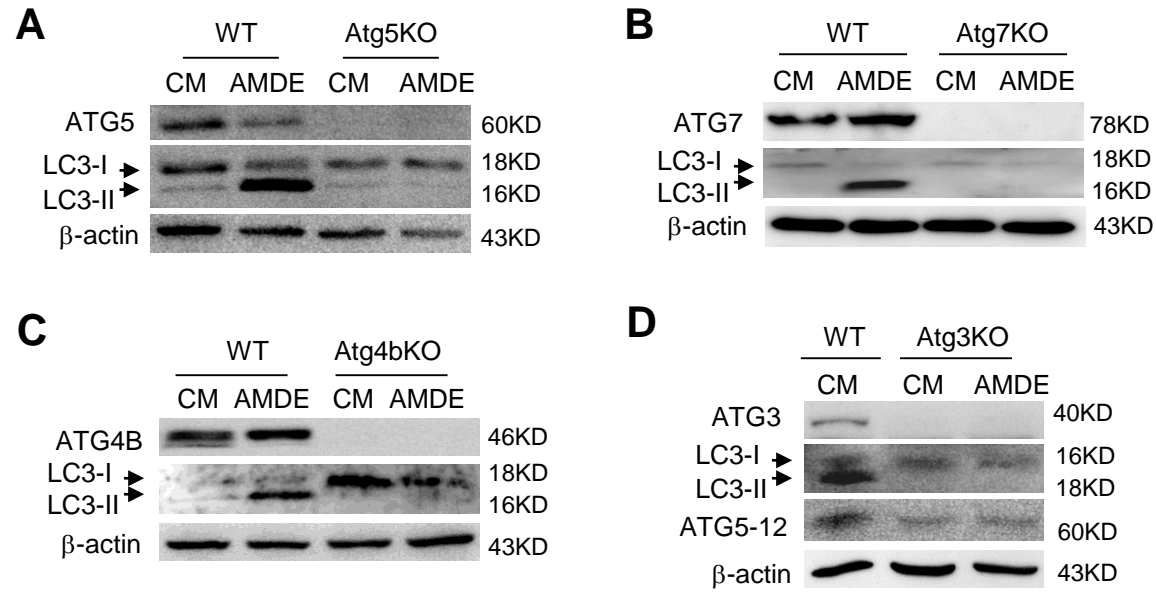

**A**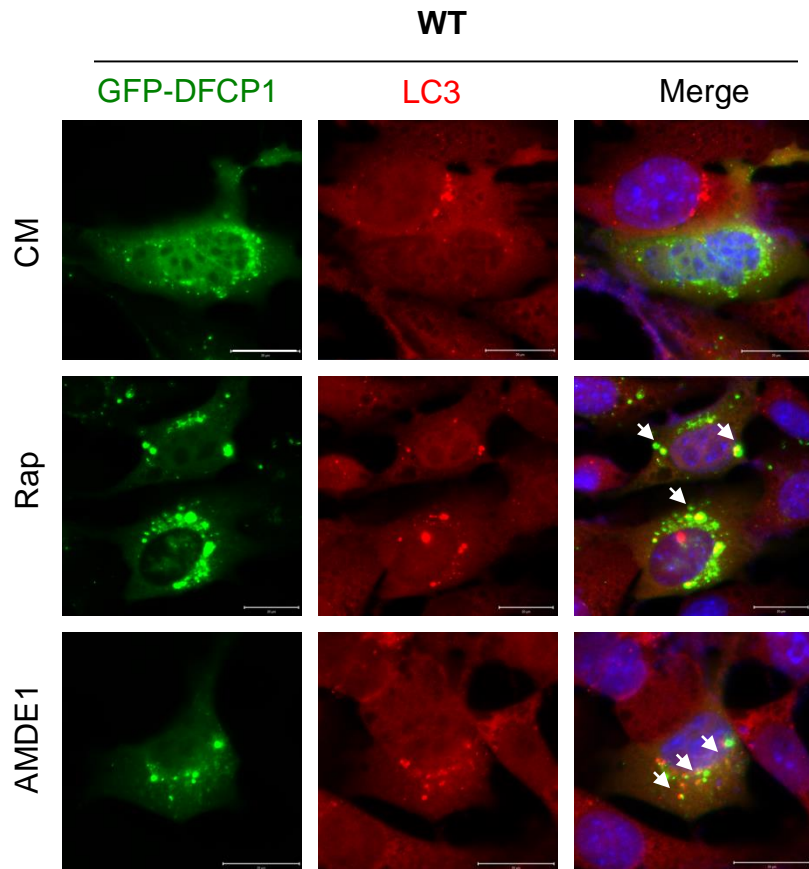**B**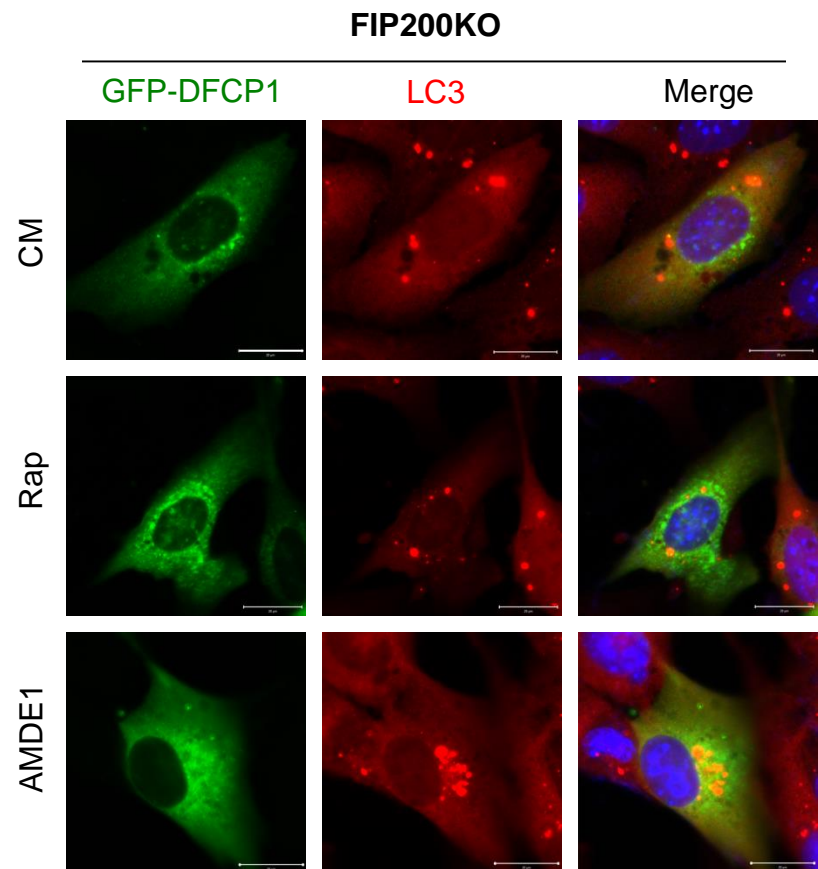

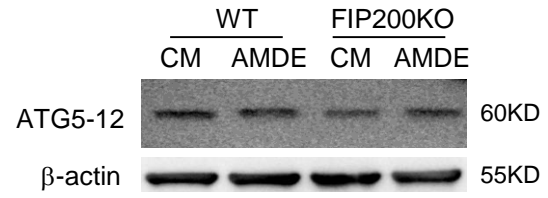

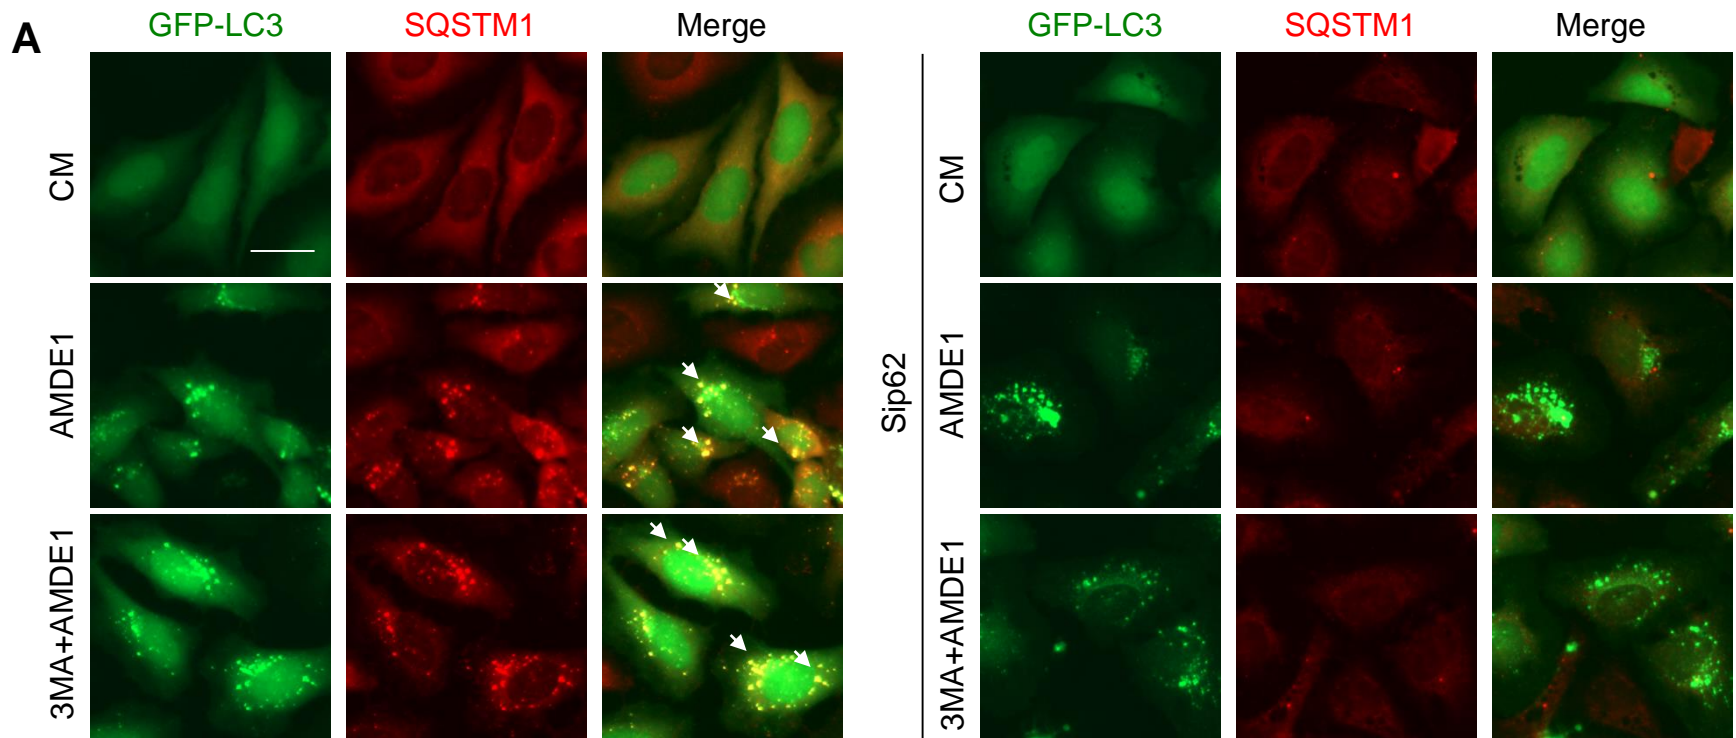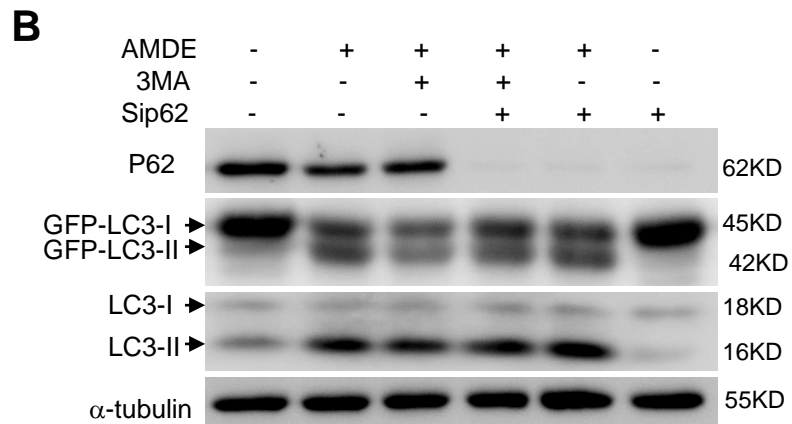

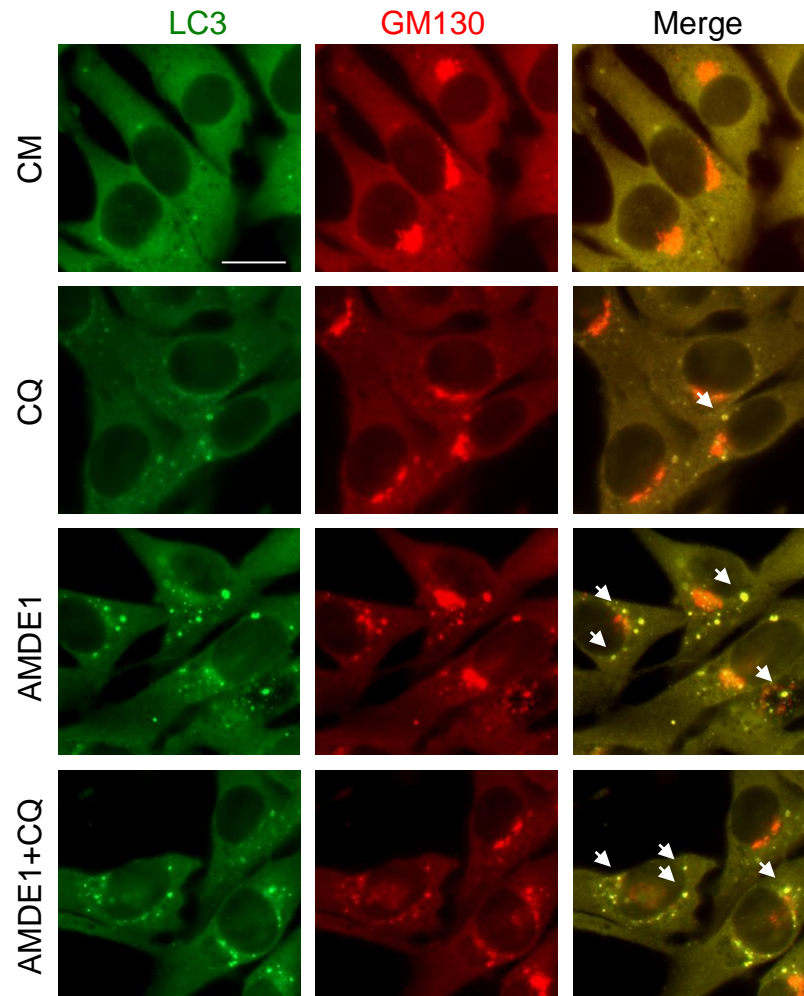



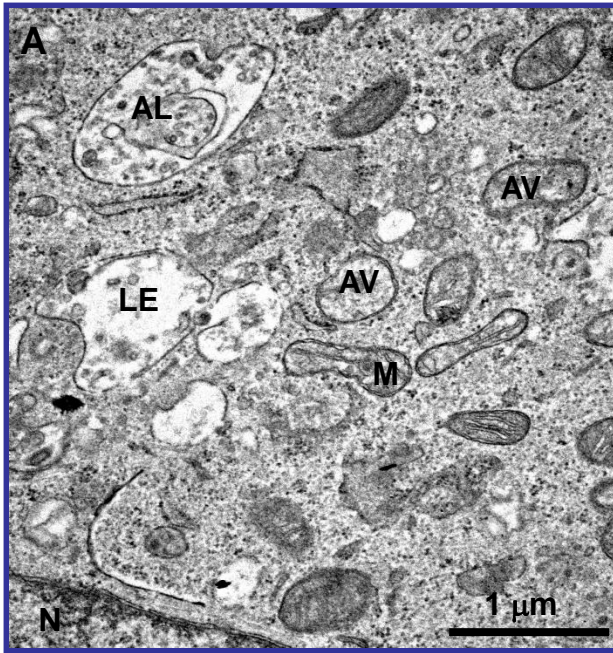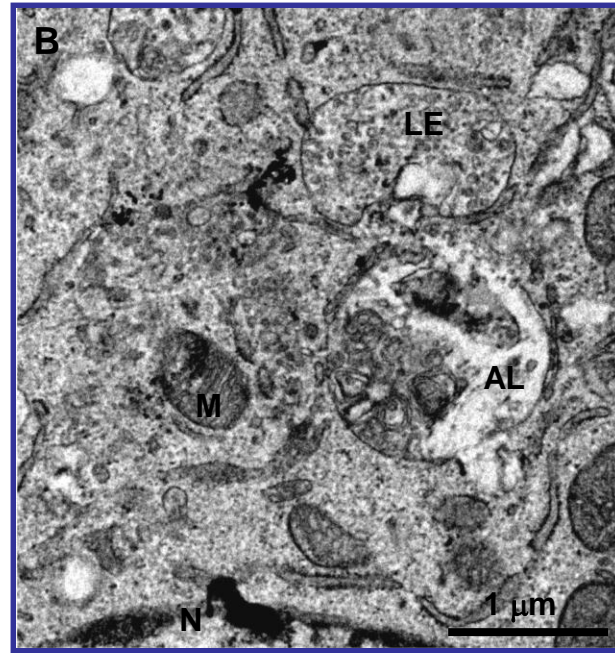

Supplement: cddis2016236x2.pdf [file cddis2016236x2.pdf]
